# Supplementary material for: Porous g-C3N4/TiO2 foam photocatalytic filter for treating NO indoor gas
Source: Royal Society of Chemistry journal article supplement (doi:10.1039/d1en00318f), 2021-01-01
Supplement: d1en00318f1.pdf [file d1en00318f1.pdf]

## *Supporting Information*

# **Porous g-C<sub>3</sub>N<sub>4</sub>/TiO<sub>2</sub> foam photocatalytic filter for treating NO indoor gas**

*Mingwen Xiong, ‡\*<sup>a</sup> Ying Tao, ‡<sup>b</sup> Zhishu Zhao,<sup>c</sup> Qiong Zhu,<sup>b</sup> Xiaoqi Jin,<sup>a</sup> Shengqiang Zhang,<sup>a</sup>*

*Ming Chen<sup>e</sup> and Guisheng Li <sup>\*bcd</sup>*

*<sup>a</sup>School of Materials and Chemical Engineering, Bengbu University, Bengbu 233030, PR China, E-mail: xiongmw@163.com*

*<sup>b</sup>School of Environmental and Geographical Sciences, Wetland ecosystem observation and research field station, Shanghai Normal University, Shanghai, 200234, P. R. China.*

*<sup>c</sup>The Education Ministry Key Lab of Resource Chemistry, Shanghai Key Laboratory of Rare Earth Functional Materials, Shanghai, 200234, P. R. China*

*<sup>d</sup>School of Materials Science and Engineering, University of Shanghai for Science and Technology, Shanghai 200093, China*

*<sup>e</sup>School of Chemistry and Chemical Engineering, Yangzhou University, Yangzhou 225002, P. R. China*

*‡These authors have contributed equally.*

\*Corresponding author: Prof. Mingwen Xiong, Prof. Guisheng Li

E-mail address: xiongmw@163.com, liguisheng@shnu.edu.cn

Tel: +86-021-64321673

Supporting Information consists of 5 pages containing 6 figures.

## CONTENTS

## CONTENTS

|                                                                                                                                                                                                                                                           |           |
|-----------------------------------------------------------------------------------------------------------------------------------------------------------------------------------------------------------------------------------------------------------|-----------|
| <b>Fig. S1. SEM images of TiO<sub>2</sub> foam. ....</b>                                                                                                                                                                                                  | <b>S3</b> |
| <b>Fig. S2. SEM images of TiO<sub>2</sub> foam after magnification. ....</b>                                                                                                                                                                              | <b>S3</b> |
| <b>Fig. S3. SEM images of TiO<sub>2</sub> foam and 1.0-C<sub>3</sub>N<sub>4</sub>/TiO<sub>2</sub> foam after magnification. ....</b>                                                                                                                      | <b>S4</b> |
| <b>Fig. S4. Infrared spectra and Raman spectra of as-formed photocatalysts. ....</b>                                                                                                                                                                      | <b>S4</b> |
| <b>Fig. S5. Dependence of ln(C/C<sub>0</sub>) on irradiation time of g-C<sub>3</sub>N<sub>4</sub>, TiO<sub>2</sub> foam, 1.0-C<sub>3</sub>N<sub>4</sub>/TiO<sub>2</sub> foam under visible-light (<math>\lambda \geq 400</math> nm) irradiation. ....</b> | <b>S4</b> |
| <b>Fig. S6. The inhibition ratio of KI, TBA, and PBQ as scavengers on the photocatalytic NO oxidation process by using 1.0-C<sub>3</sub>N<sub>4</sub>/TiO<sub>2</sub> foam as photocatalyst. ....</b>                                                     | <b>S5</b> |

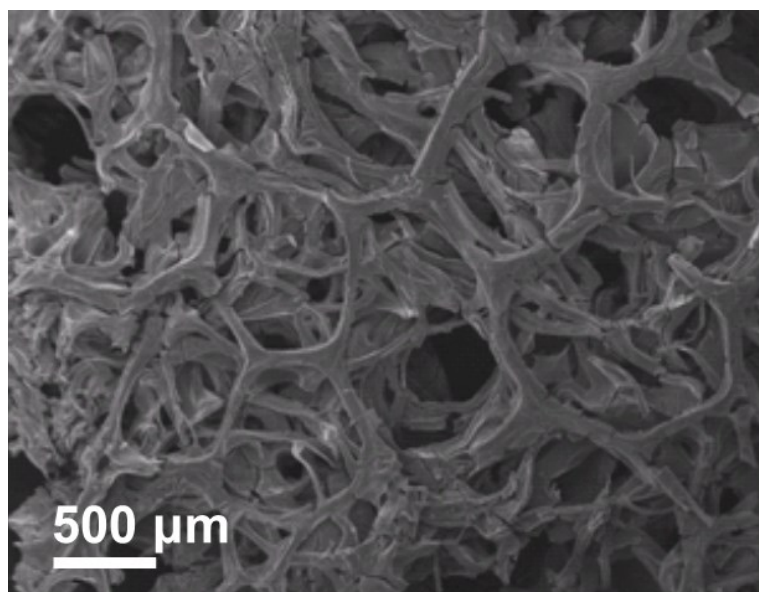

**Fig. S1.** SEM images of TiO<sub>2</sub> foam.

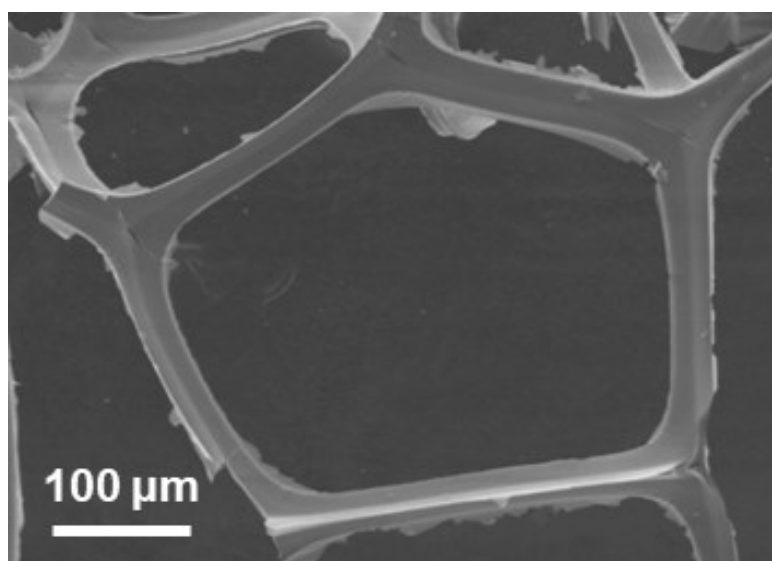

**Fig. S2.** SEM images of TiO<sub>2</sub> foam after magnification.

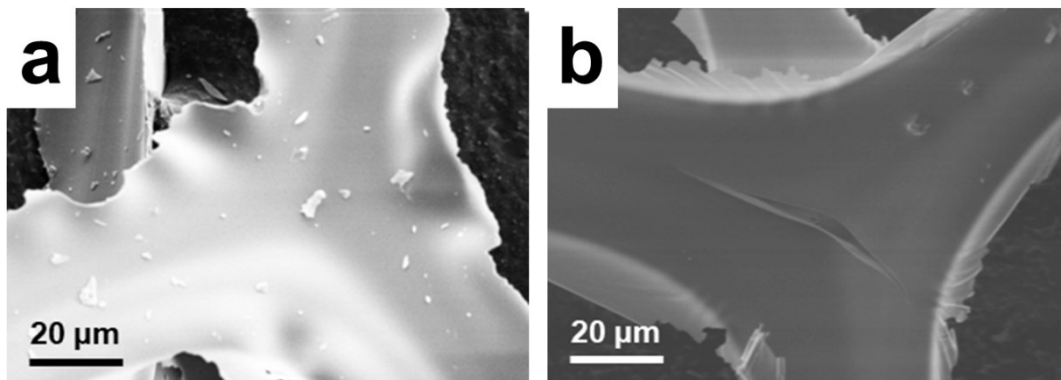

Fig. S3. SEM images of TiO<sub>2</sub> foam and 1.0-C<sub>3</sub>N<sub>4</sub>/TiO<sub>2</sub> foam after magnification.

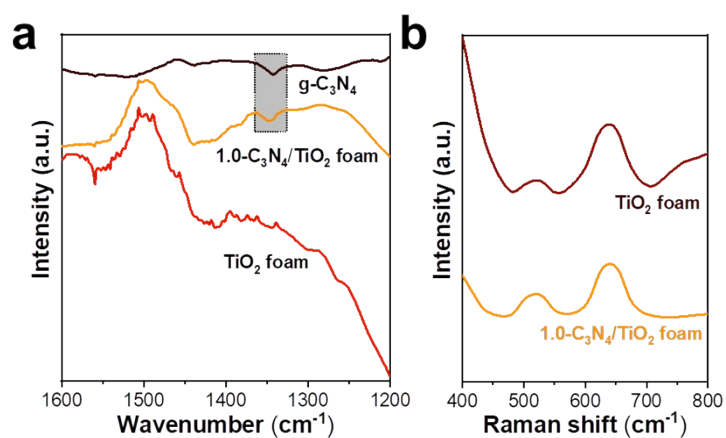

Fig. S4. (a, b) Infrared spectra and (c) Raman spectra of as-formed photocatalysts.

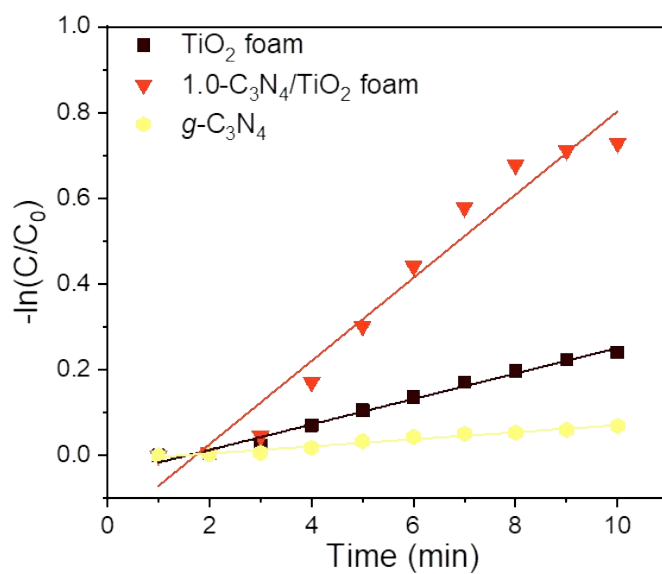

Fig. S5. Dependence of  $\ln(C/C_0)$  on irradiation time of g-C<sub>3</sub>N<sub>4</sub>, TiO<sub>2</sub> foam, 1.0-C<sub>3</sub>N<sub>4</sub>/TiO<sub>2</sub> foam under visible-light ( $\lambda \geq 400$  nm) irradiation.

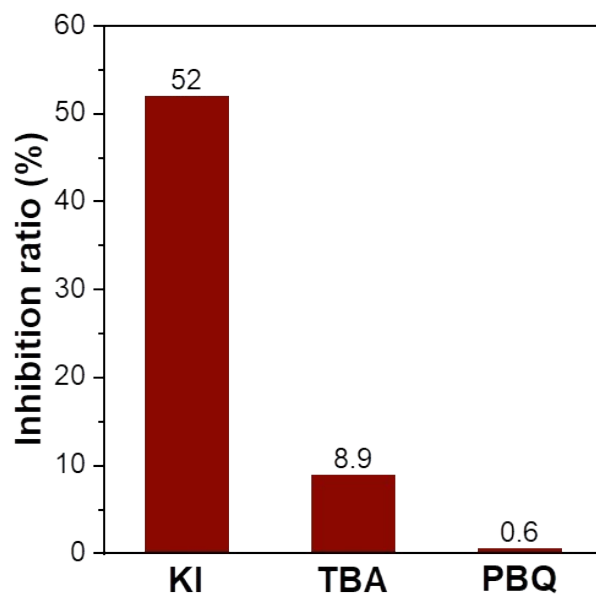

**Fig. S6.** The inhibition ratio of KI, TBA, and PBQ as scavengers on the photocatalytic NO oxidation process by using 1.0-C<sub>3</sub>N<sub>4</sub>/TiO<sub>2</sub> foam as photocatalyst.
